# Supplementary material for: Source Apportionment of Fine Aerosol at an Urban Site of Beijing using a Chemical Mass Balance Model
Source: Copernicus journal article supplement (doi:10.5194/acp-2020-1020), 2020-12-03
Supplement: Supplementary file 1 [file acp-2020-1020-supplement.pdf]

## Supplemental Information

### Source Apportionment of Fine Aerosol by application of a Chemical Mass Balance (CMB) Model at an Urban site of Beijing

Jingsha Xu, Di Liu, Xuefang Wu, Tuan V. Vu, Yanli Zhang, Pingqing Fu, Yele Sun, Weiqi Xu, Bo Zheng, Roy M. Harrison, Zongbo Shi

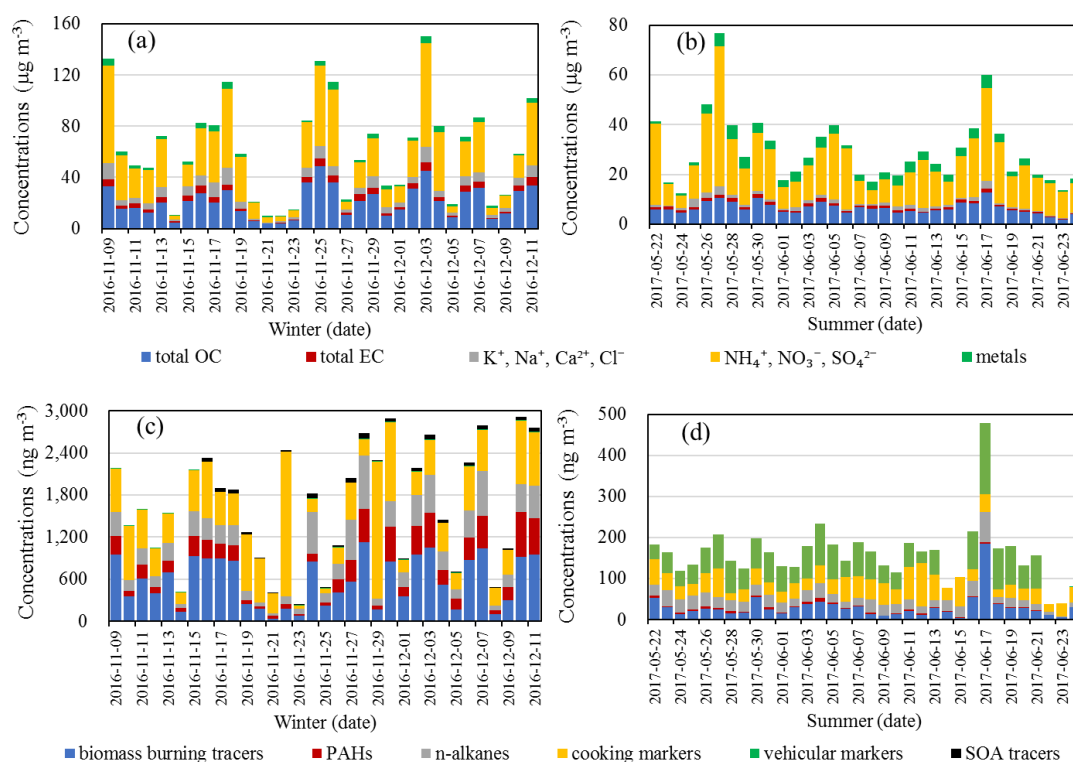

**Figure S1.** Stacked bar plots of the concentrations of PM<sub>2.5</sub> components. **Abbreviations:** OC: organic carbon; EC: elemental carbon; PAH: polycyclic aromatic hydrocarbon; SOA: secondary organic aerosol. “Metals” is the summed concentrations of Al, Ti, V, Cr, Mn, Fe, Co, Ni, Cu, Zn, Cd, Sr, Sb, Sn, Ba, Pb; “PAH” is the summed concentrations of phenanthrene, anthracene, fluoranthene, acenaphthylene, acenaphthene, fluorene, pyrene, benzo(a)anthracene, chrysene, benzo(b)fluorene, benzo(b)fluoranthene, benzo(k)fluoranthene, benzo(a)pyrene, benzo(e)pyrene, perylene, indeno(1,2,3-cd)pyrene, dibenzo(a,h)anthracene, benzo(ghi)perylene, coronene, picene and retene; “n-alkane” is the summed concentrations of C24, C25, C26, C27, C28, C29, C30, C31, C32, C33, C34; “cooking markers” is the summed concentrations of palmitic acid, stearic acid, cholesterol; “vehicle markers” is the summed concentrations of 17a(H)-22,29,30-trisnorhopane and 17b(H),21a(H)-norhopane; “SOA” is the summed concentrations of 2-methylthreitol, 2-methylerythritol, 2-methylglyceric acid, cis-2-methyl-1,3,4-trihydroxy-1-butene, 3-methyl-2,3,4-trihydroxy-1-butene, trans-2-methyl-1,3,4-trihydroxy-1-butene, 3-hydroxyglutaric acid(3-HGA), Pinic acid, Pinonic acid, C5-alkene triols, 2-methyltetrols, 3-MBTCA (3-Methyl-1,2,3-butanetricarboxylic Acid), beta-caryophyllinic acid, 3-acetylpentanedioic acid, 3-

acetylhexanedioic acid, 3-isopropylpentanedioic acid, DHOPA (2,3-dihydroxy-4-oxopentanoic acid) and 3-Hydroxy-4,4-dimethylglutaric acid.

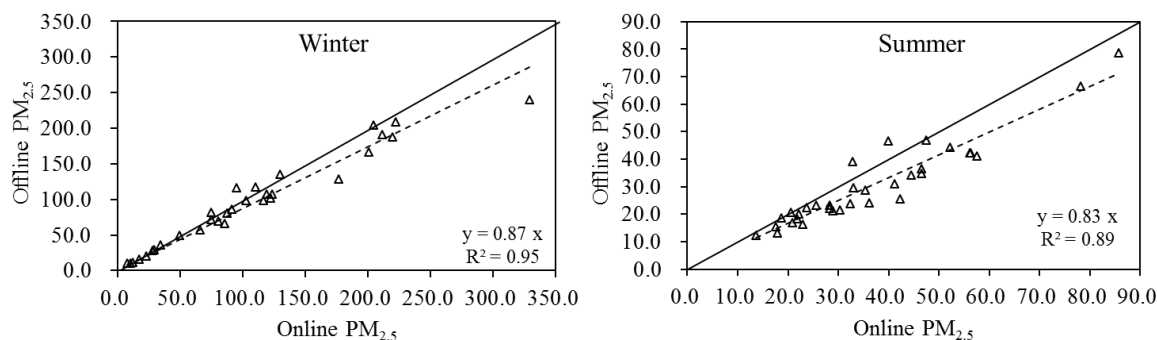

**Figure S2.** Regression analysis of gravimetrically measured  $PM_{2.5}$  (offline  $PM_{2.5}$ ) and online  $PM_{2.5}$  in winter and summer at IAP, Beijing

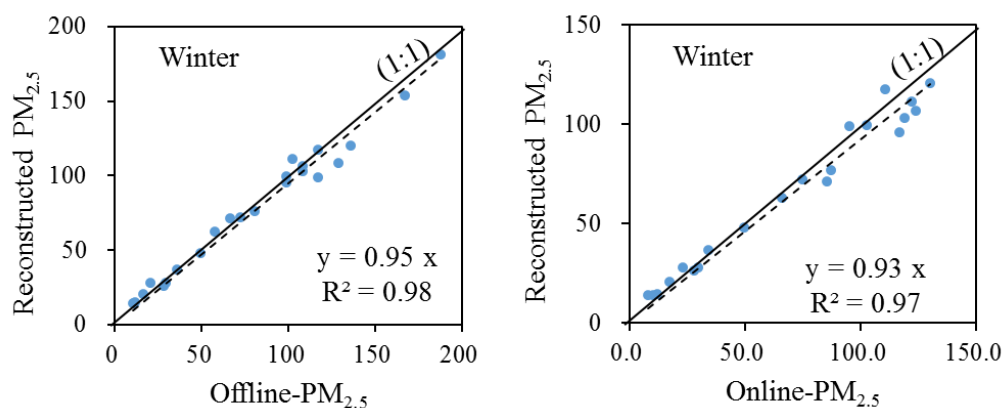

**Figure S3.** Regression results between reconstructed  $PM_{2.5}$  and offline/online  $PM_{2.5}$  by chemical mass closure method in winter excluding outliers.

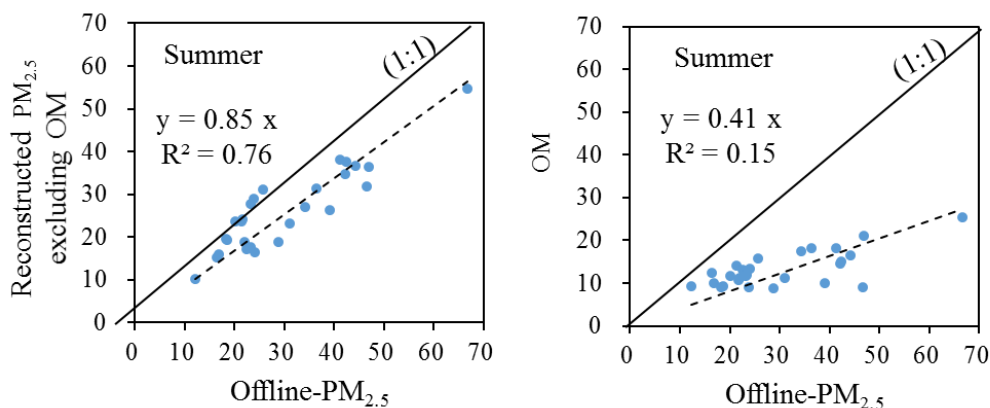

**Figure S4.** Regression results between inorganics (reconstructed  $PM_{2.5}$  excluding OM) and OM with offline- $PM_{2.5}$  by chemical mass closure method in winter excluding outliers.

**Table S1.** Concentrations (mean±SD (min-max),  $\mu\text{g m}^{-3}$ ) of chemical components in  $\text{PM}_{2.5}$  by applying chemical mass closure method

| Component                                | Winter                  | Summer                 |
|------------------------------------------|-------------------------|------------------------|
| $\text{NO}_3^-$                          | 12.49±9.38 (0.87-34.63) | 7.16±4.94 (1.53-26.12) |
| $\text{SO}_4^{2-}$                       | 8.53±7.05 (1.27-24.21)  | 6.87±3.96 (1.96-19.48) |
| $\text{NH}_4^+$                          | 8.24±5.63 (0.50-22.62)  | 3.62±3.14 (0.08-14.83) |
| $\text{Cl}^-$                            | 3.80±2.32 (0.00-8.73)   | 0.47±0.42 (0.12-1.96)  |
| $\text{K}^+$                             | 1.30±1.01 (0.15-3.80)   | 0.37±0.35 (0.11-2.05)  |
| $\text{Na}^+$                            | 0.42±0.24 (0.09-0.93)   | 0.20±0.16 (0.03-0.73)  |
| Geological minerals                      | 5.33±3.25 (1.03-12.72)  | 3.52±1.79 (0.65-6.99)  |
| Total other elements                     | 0.53±0.35 (0.12-1.29)   | 0.35±0.20 (0.07-1.00)  |
| EC                                       | 3.5±2.0 (0.3-6.6)       | 0.9±0.4 (0.2-1.7)      |
| OM                                       | 37.7±21.5 (6.9-85.4)    | 12.9±4.7 (3.6-25.4)    |
| Bound water-Offline                      | 4.0±3.7 (0.2-13.4)      | 2.8±1.4 (0.8-7.3)      |
| Reconstructed $\text{PM}_{2.5}$ -Offline | 83.4±53.6 (14.0-202.1)  | 39.4±13.0 (19.6-80.0)  |
| Offline $\text{PM}_{2.5}$                | 88.6±63.6 (10.3-239.9)  | 30.0±12.7 (12.2-66.7)  |
| Bound water-Online                       | 4.5±4.1 (0.3-14.9)      | 3.5±1.8 (0.9-9.1)      |
| Reconstructed $\text{PM}_{2.5}$ -Online  | 83.8±53.9 (14.0-203.7)  | 40.1±13.4 (19.8-81.8)  |
| Online $\text{PM}_{2.5}$                 | 99.7±79.1 (8.1-328.7)   | 36.4±14.9 (13.7-78.1)  |

Note: 5 samples in winter and 7 samples in summer were not included for the calculation of bound water and reconstructed  $\text{PM}_{2.5}$  due to insufficient ions and  $\text{NH}_3$  data. These samples were excluded for the calculation of average online and offline  $\text{PM}_{2.5}$  in this table as well for better comparison.

**Table S2.** Annual average primary OC emissions (Unit: tonne) in Beijing from the 2016 and 2017 Multi-resolution Emission Inventory for China (MEIC)

| Sector         | Fuel        | 2016  | 2017  |
|----------------|-------------|-------|-------|
| Power          | Coal        | 0     | 0     |
| Power          | Oil         | 0     | 0     |
| Power          | Natural Gas | 0     | 0     |
| Industry       | Coal        | 0     | 0     |
| Industry       | Oil         | 538   | 583   |
| Industry       | Natural Gas | 0     | 0     |
| Industry       | Process     | 1161  | 1083  |
| Residential    | Coal        | 6687  | 4312  |
| Residential    | Oil         | 24    | 23    |
| Residential    | Natural Gas | 0     | 0     |
| Residential    | Biofuel     | 5548  | 4993  |
| Transportation | Oil         | 1059  | 1026  |
| Total          |             | 15017 | 12020 |

**Table S3.** The ratios of OC/PM<sub>2.5</sub> (or OM/OC) for different sources

|                           | OC/PM <sub>2.5</sub> | Reference            |
|---------------------------|----------------------|----------------------|
| Straw burning             | 0.546                | (Zhang et al., 2007) |
| Wood burning              | 0.3                  | (Wang et al., 2009)  |
| Cooking                   | 1.4 (OM/OC)          | (Zhao et al., 2007)  |
| Light-duty gasoline cars  | 0.317                |                      |
| Heavy-duty gasoline cars  | 0.549                | (Cai et al., 2017)   |
| Diesel cars               | 0.569                |                      |
| Vegetative detritus       | 2.1 (OM/OC)          | (Bae et al., 2006b)  |
| Anthracite                | 0.446                |                      |
| Bituminite                | 0.403                | (Zhang et al., 2008) |
| Coal briquette            | 0.432                |                      |
| Secondary organic aerosol | 2.17 (OM/OC)         | (Bae et al., 2006a)  |
| Oxygenated OA             | 2.2 (OM/OC)          | (Zhang et al., 2005) |
| Oxygenated OA             | 1.85 ~ 2.3 (OM/OC)   | (Aiken et al., 2008) |

**Table S4.** Reconstructed source contributions and their relative abundance in reconstructed PM<sub>2.5</sub> mass in urban Beijing

|                                | Mass concentrations ( $\mu\text{g m}^{-3}$ ) |           |                                                       | Mass concentrations/<br>Reconstructed mass (%) |            |
|--------------------------------|----------------------------------------------|-----------|-------------------------------------------------------|------------------------------------------------|------------|
|                                | Winter                                       | Summer    |                                                       | Winter                                         | Summer     |
| SNA                            | 30.5±21.8                                    | 17.7±10.5 | SNA/ RM                                               | 34.1±9.7                                       | 48.5±11.9  |
| Geological minerals            | 5.3±3.2                                      | 3.5±1.8   | Geological minerals/ RM                               | 7.0±3.0                                        | 10.4±5.5   |
| Vegetative detritus            | 0.2±0.2                                      | 0.2±0.2   | Vegetative detritus/ RM                               | 0.3±0.2                                        | 0.7±0.4    |
| Biomass burning                | 8.9±6.2                                      | 0.8±0.9   | Biomass burning/ RM                                   | 11.0±5.9                                       | 2.1±1.5    |
| Gasoline vehicles              | 4.7±3.6                                      | 0.7±0.4   | Gasoline vehicles/ RM                                 | 6.5±4.8                                        | 2.2±1.4    |
| Diesel vehicles                | 0.9±2.0                                      | 0.1±0.3   | Diesel vehicles/ RM                                   | 1.0±2.0                                        | 0.4±0.9    |
| Industrial CC                  | 11.6±9.7                                     | 4.3±1.7   | Industrial CC/ RM                                     | 13.8±7.3                                       | 13.2±6.1   |
| Residential CC                 | 6.1±7.3                                      | 0.4±0.3   | Residential CC/ RM                                    | 7.6±5.7                                        | 1.4±1.1    |
| Cooking                        | 3.1±3.0                                      | 0.9±0.6   | Cooking/ RM                                           | 3.9±2.5                                        | 2.8±1.6    |
| Other OM                       | 11.7±10.8                                    | 6.5±3.2   | Other OM/ RM                                          | 14.8±7.9                                       | 18.3±5.9   |
| Reconstructed mass (RM)        | 83.1±49.0                                    | 35.1±15.0 |                                                       |                                                |            |
| Offline PM <sub>2.5</sub> mass | 105.0±77.4                                   | 36.5±17.0 | Reconstructed mass/<br>Offline PM <sub>2.5</sub> mass | 96.6±17.6                                      | 121.7±26.6 |
| Online PM <sub>2.5</sub> mass  | 94.8±64.4                                    | 30.2±14.8 | Reconstructed mass/<br>Offline PM <sub>2.5</sub> mass | 91.9±24.1                                      | 99.0±19.1  |

## References

- Aiken, A. C., DeCarlo, P. F., Kroll, J. H., Worsnop, D. R., Huffman, J. A., Docherty, K. S., Ulbrich, I. M., Mohr, C., Kimmel, J. R., Sueper, D., Sun, Y., Zhang, Q., Trimborn, A., Northway, M., Ziemann, P. J., Canagaratna, M. R., Onasch, T. B., Alfarra, M. R., Prevot, A. S. H., Dommen, J., Duplissy, J., Metzger, A., Baltensperger, U., and Jimenez, J. L.: O/C and OM/OC Ratios of Primary, Secondary, and Ambient Organic Aerosols with High-Resolution Time-of-Flight Aerosol Mass Spectrometry, *Environ. Sci. Technol.*, 42, 4478-4485, 10.1021/es703009q, 2008.
- Bae, M.-S., Demerjian, K. L., and Schwab, J. J.: Seasonal estimation of organic mass to organic carbon in PM<sub>2.5</sub> at rural and urban locations in New York state, *Atmospheric Environment*, 40, 7467-7479, <https://doi.org/10.1016/j.atmosenv.2006.07.008>, 2006a.
- Bae, M.-S., Schauer, J. J., and Turner, J. R.: Estimation of the Monthly Average Ratios of Organic Mass to Organic Carbon for Fine Particulate Matter at an Urban Site, *Aerosol Sci. Technol.*, 40, 1123-1139, 10.1080/02786820601004085, 2006b.
- Cai, T., Zhang, Y., Fang, D., Shang, J., Zhang, Y., and Zhang, Y.: Chinese vehicle emissions characteristic testing with small sample size: Results and comparison, *Atmospheric Pollution Research*, 8, 154-163, <https://doi.org/10.1016/j.apr.2016.08.007>, 2017.
- Wang, Q., Shao, M., Zhang, Y., Wei, Y., Hu, M., and Guo, S.: Source apportionment of fine organic aerosols in Beijing, *Atmos. Chem. Phys.*, 9, 8573-8585, 10.5194/acp-9-8573-2009, 2009.
- Zhang, Q., Worsnop, D. R., Canagaratna, M. R., and Jimenez, J. L.: Hydrocarbon-like and oxygenated organic aerosols in Pittsburgh: insights into sources and processes of organic aerosols, *Atmospheric Chemistry And Physics*, 5, 3289-3311, 10.5194/acp-5-3289-2005, 2005.
- Zhang, Y.-x., Shao, M., Zhang, Y.-h., Zeng, L.-m., He, L.-y., Zhu, B., Wei, Y.-j., and Zhu, X.-l.: Source profiles of particulate organic matters emitted from cereal straw burnings, *Journal of Environmental Sciences*, 19, 167-175, [https://doi.org/10.1016/S1001-0742\(07\)60027-8](https://doi.org/10.1016/S1001-0742(07)60027-8), 2007.
- Zhang, Y., Schauer, J. J., Zhang, Y., Zeng, L., Wei, Y., Liu, Y., and Shao, M.: Characteristics of Particulate Carbon Emissions from Real-World Chinese Coal Combustion, *Environ. Sci. Technol.*, 42, 5068-5073, 10.1021/es7022576, 2008.
- Zhao, Y., Hu, M., Slanina, S., and Zhang, Y.: Chemical Compositions of Fine Particulate Organic Matter Emitted from Chinese Cooking, *Environ. Sci. Technol.*, 41, 99-105, 10.1021/es0614518, 2007.
